# Supplementary material
Source: Springer Nature journal article supplement (https://www.springermedizin.de/resource/supplementary/13221_2014_83_MOESM2_ESM.pdf/9680924)

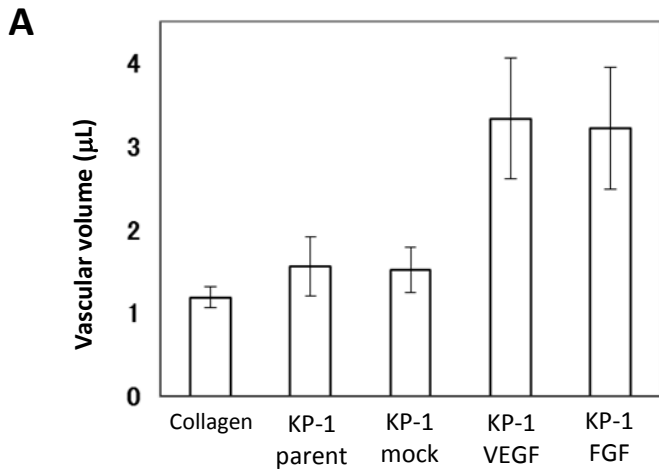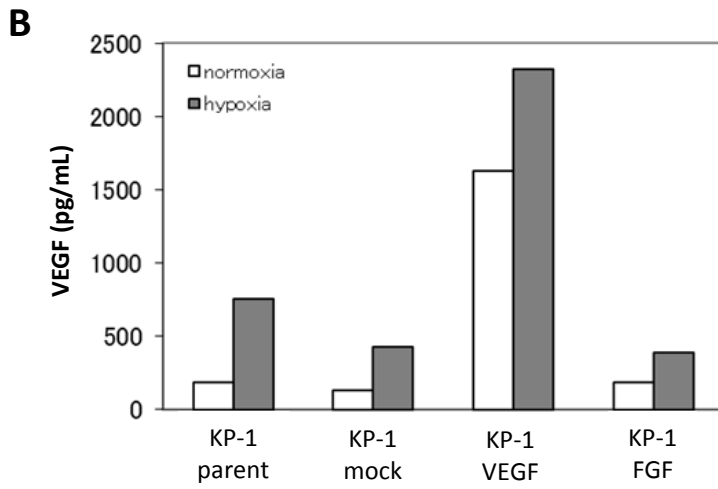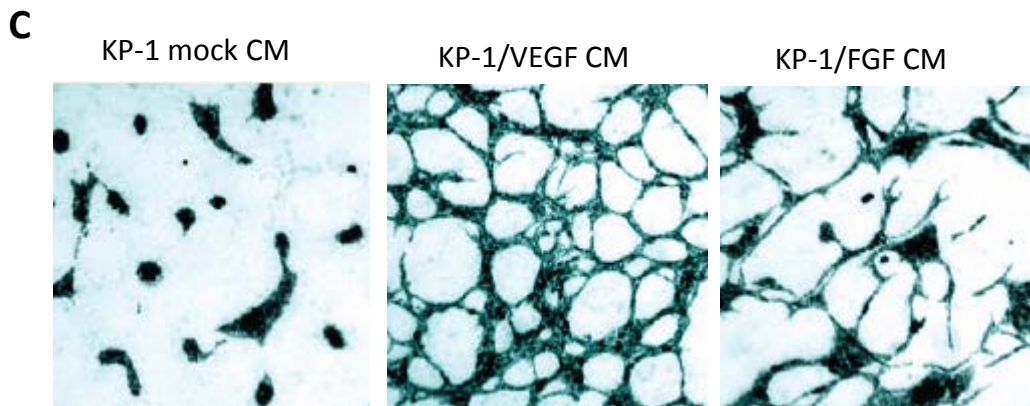

Supplement: MOESM2 [file 9680924]
